# Supplementary material for: Identification and Functional Characterization of Genes Encoding Phenylacetaldehyde Reductases That Catalyze the Last Step in the Biosynthesis of Hydroxytyrosol in Olive
Source: MDPI journal article supplement (doi:10.3390/plants10071268), 2021-06-22
Supplement: s1 [file s1]

## Supplementary Figures and tables

**Table S1:** Putative PAR transcripts selected. Identities and mean expression levels in the transcriptome of seven selected olive cultivars [26].

| Transcript<br>(Olive genome ID) | e-value              | Homology | Identity<br>(%) | Mean expression level in<br>transcriptome (FPKM) |
|---------------------------------|----------------------|----------|-----------------|--------------------------------------------------|
| Oe6A039209                      | 0                    | Rr4HPAR1 | 90.0            | 10666                                            |
| Oe6A025790                      | 0                    | Rr4HPAR1 | 88.7            | 81045                                            |
| Oe6A018558                      | 0                    | Rr4HPAR1 | 88.3            | 414                                              |
| Oe6A068874                      | $1 \times 10^{-147}$ | Rr4HPAR2 | 83.0            | 576                                              |
| Oe6A030751                      | $1 \times 10^{-148}$ | Rr4HPAR2 | 82.8            | 860                                              |
| Oe6A074153                      | $1 \times 10^{-142}$ | Rr4HPAR2 | 79.0            | 54                                               |

**Table S2:** Accession numbers of genes used for phylogenetic analysis.

| Identifier | Gene Bank Accession | Organism                     |
|------------|---------------------|------------------------------|
| EgCCR      | O04877              | <i>Eucalyptus gunni</i>      |
| EgCAD1     | O04391              | <i>Eucalyptus gunni</i>      |
| ZmCCR      | CAA66707.1          | <i>Zea mays</i>              |
| ZmDFR      | P51108.1            | <i>Zea mays</i>              |
| VuCPRD14   | P93700              | <i>Vigna unguiculata</i>     |
| VrERE      | AAD53967.1          | <i>Vigna radiata</i>         |
| DcDFR      | P51104.1            | <i>Dianthus caryophyllus</i> |
| VvDFR      | P51110.1            | <i>Vitis vinifera</i>        |
| VvDFR      | P51110.1            | <i>Vitis vinifera</i>        |
| LeADH      | ABR15770            | <i>Solanum lycopersicum</i>  |
| LePAR1     | ABR15768.1          | <i>Solanum lycopersicum</i>  |
| LePAR2     | ABR15769.1          | <i>Solanum lycopersicum</i>  |
| PtAAR1     | QBL52492.1          | <i>Populus trichocarpa</i>   |
| PtAAR2     | QBL52491.1          | <i>Populus trichocarpa</i>   |
| PtAAR3     | QBL52490.1          | <i>Populus trichocarpa</i>   |
| PtPAR1     | QBL52487.1          | <i>Populus trichocarpa</i>   |
| PtPAR2     | QBL52486.1          | <i>Populus trichocarpa</i>   |
| OE6A018558 |                     | <i>Olea europaea</i>         |
| OE6A030751 |                     | <i>Olea europaea</i>         |
| OE6A068874 |                     | <i>Olea europaea</i>         |
| OE6A074153 |                     | <i>Olea europaea</i>         |
| OePAR1.1   | MW038826            | <i>Olea europaea</i>         |
| OePAR1.2   | MW038827            | <i>Olea europaea</i>         |
| Rr4HPAR1,  | AUI41113            | <i>Rhodiola rosea</i>        |
| Rr4HPAR2,  | AUI41114            | <i>Rhodiola rosea</i>        |
| SbDFR      | P93776              | <i>Sorghum bicolor</i>       |
| PhDFR      | P14720.2            | <i>Petunia hybrida</i>       |
| RhDFR      | BAA12723.1          | <i>Rosa hybrid</i>           |

**Figure S1.** Multiple sequence alignment of the six putative olive PAR proteins with the PAR proteins fully characterized in *Rhodiola rosea*, *Populus trichocarpa* and *Solanum lycopersicum*. The multiple sequence alignments of plant PAR amino acid sequences were calculated using the ClustalX program (<https://clustalx.software.informer.com>) and displayed with GeneDoc (<https://genedoc.software.informer.com>). The highly conserved residues are shaded. Active site motif YXXXK is squared in red and amino acids forming the canonical catalytic triad, Ser130-Tyr165-Lys169, are indicated with a green triangle (Rr4HPAR1 numbering). NADP-binding motif TGXXGXX(GA) is squared in blue and amino acids involved in cofactor binding are indicated with orange triangle. Accession numbers are given in Table S2.

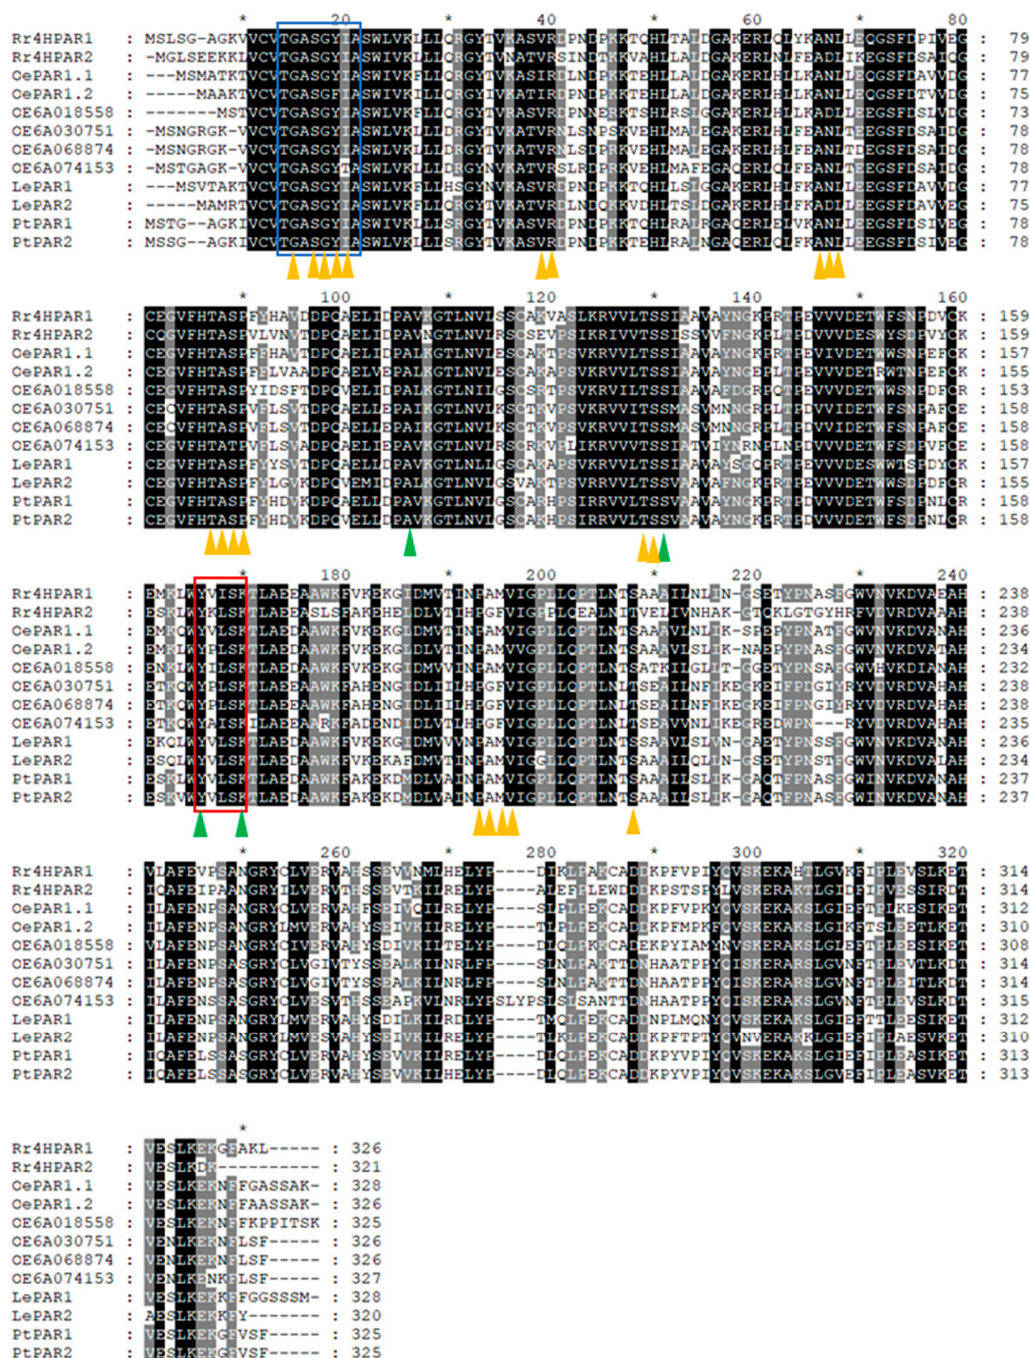

**Figure S2.** Induction of recombinant OePAR proteins in *Escherichia coli*. SDS-PAGE followed by a Coomassie blue staining showing OePARs presence in *E. coli* culture total (T) and soluble (S) fractions. Arrow shows OePAR protein at the expected molecular weight (MW).

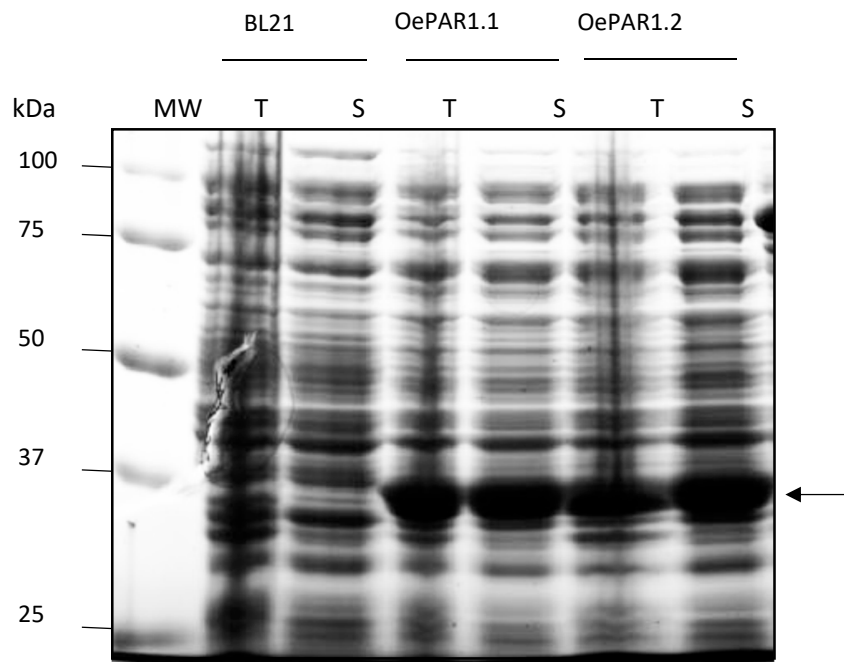

**Figure S3.** Effect of pH on the activity of OePAR1.1 and OePAR1.2 proteins.

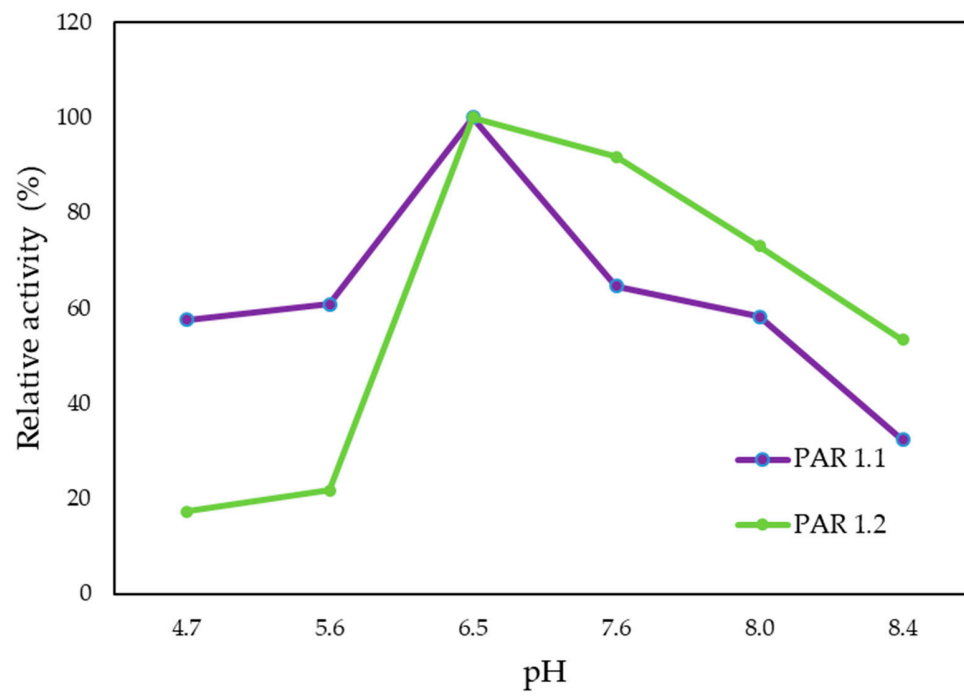

Figure S4: Effect of temperature on the activity of OePAR1.1 and OePAR1.2 proteins

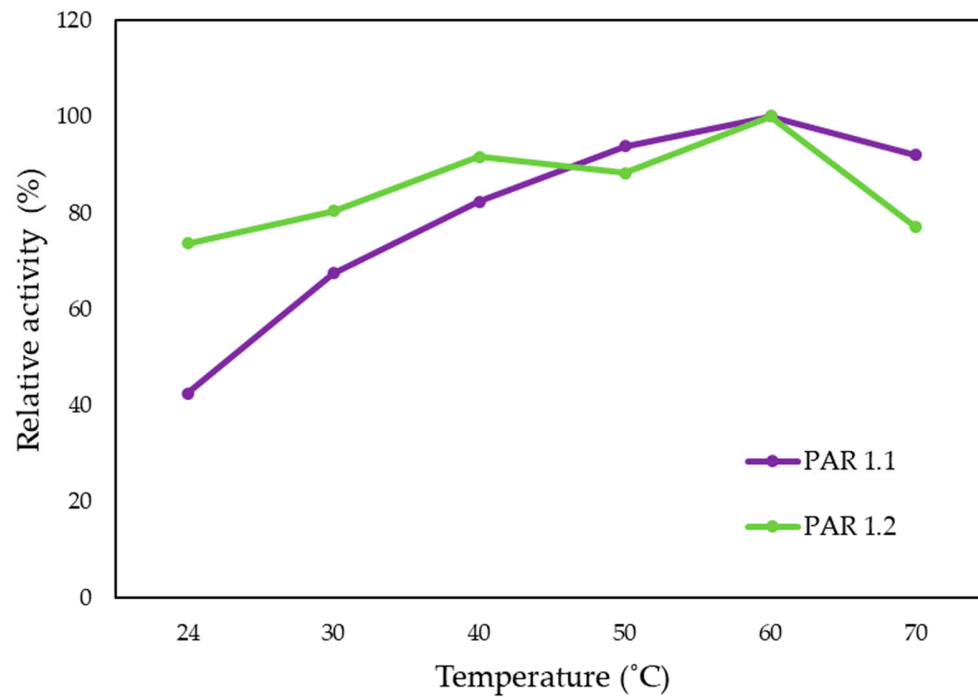

**Figure S3S5.** Thermal inactivation kinetics of OePAR1.1 and OePAR1.2 proteins.

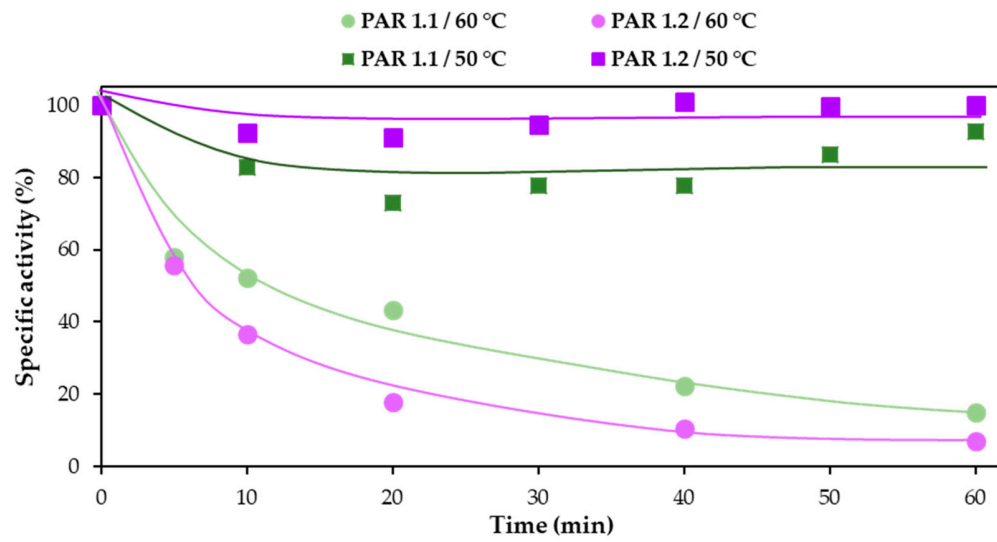

**Figure S4S6:** Kinetic parameters calculated for OePAR1.1 and OePAR1.2

PAR 1.1

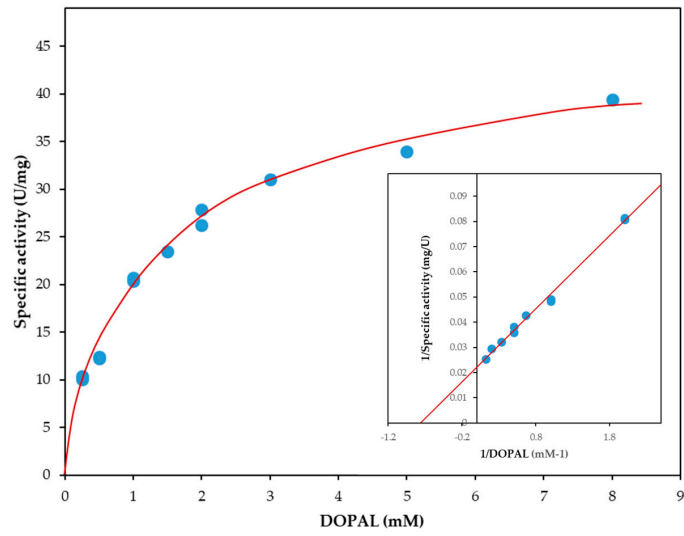

PAR1.2

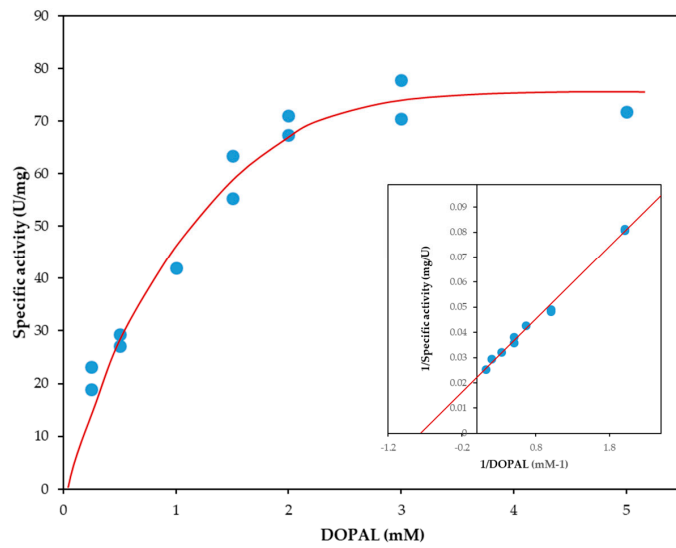

**Table S3.** Phenolic composition of olive fruits from cultivars Picual, Menya, Shengeh and Piñonera along ripening.

| Picual                          |                  |                  |                  |                  |
|---------------------------------|------------------|------------------|------------------|------------------|
| Phenolics ( $\mu\text{mol/g}$ ) | Stage I          | Stage II         | Stage III        | Stage IV         |
| Hydroxytyrosol-G                | 1.52 $\pm$ 0.03  | 1.52 $\pm$ 0.12  | 0.90 $\pm$ 0.01  | 3.09 $\pm$ 0.10  |
| Tyrosol-G                       | 0.23 $\pm$ 0.01  | 0.23 $\pm$ 0.01  | 0.15 $\pm$ 0.00  | 0.32 $\pm$ 0.01  |
| Demethyloleuropein              | 0.46 $\pm$ 0.07  | 0.16 $\pm$ 0.04  | 0.27 $\pm$ 0.00  | 0.03 $\pm$ 0.00  |
| Demethyligstroside              | 0.31 $\pm$ 0.00  | 0.07 $\pm$ 0.03  | 0.07 $\pm$ 0.00  | 0.04 $\pm$ 0.01  |
| Oleuropein                      | 57.11 $\pm$ 2.73 | 51.27 $\pm$ 1.86 | 34.80 $\pm$ 0.12 | 14.43 $\pm$ 0.16 |
| Ligstroside                     | 4.80 $\pm$ 0.46  | 4.22 $\pm$ 0.27  | 2.53 $\pm$ 0.04  | 1.44 $\pm$ 0.01  |
| Verbascoside                    | 2.26 $\pm$ 0.41  | 3.12 $\pm$ 0.28  | 2.01 $\pm$ 0.11  | 2.91 $\pm$ 0.05  |
| Luteolin -7-G                   | 1.51 $\pm$ 0.25  | 1.10 $\pm$ 0.15  | 1.01 $\pm$ 0.02  | 0.40 $\pm$ 0.03  |
| total phenolics                 | 68.20 $\pm$ 3.96 | 61.68 $\pm$ 2.77 | 41.75 $\pm$ 0.31 | 22.66 $\pm$ 0.36 |
| Menya                           |                  |                  |                  |                  |
| Phenolics ( $\mu\text{mol/g}$ ) | Stage I          | Stage II         | Stage III        | Stage IV         |
| Hydroxytyrosol-G                | 1.38 $\pm$ 0.09  | 1.81 $\pm$ 0.53  | 1.47 $\pm$ 0.09  | 1.41 $\pm$ 0.04  |
| Tyrosol-G                       | 0.20 $\pm$ 0.02  | 0.30 $\pm$ 0.09  | 0.17 $\pm$ 0.00  | 0.33 $\pm$ 0.00  |
| Demethyloleuropein              | 0.51 $\pm$ 0.00  | 0.24 $\pm$ 0.04  | 2.79 $\pm$ 0.73  | 15.89 $\pm$ 0.79 |
| Demethyligstroside              | 0.07 $\pm$ 0.00  | 0.08 $\pm$ 0.01  | 0.06 $\pm$ 0.01  | 0.03 $\pm$ 0.01  |
| Oleuropein                      | 61.58 $\pm$ 5.58 | 55.26 $\pm$ 3.03 | 44.94 $\pm$ 1.72 | 5.06 $\pm$ 0.10  |
| Ligstroside                     | 5.33 $\pm$ 0.65  | 6.32 $\pm$ 0.15  | 6.00 $\pm$ 0.47  | 0.71 $\pm$ 0.02  |
| Verbascoside                    | 0.18 $\pm$ 0.00  | 0.20 $\pm$ 0.07  | 0.40 $\pm$ 0.07  | 0.52 $\pm$ 0.00  |
| Luteolin -7-G                   | 0.11 $\pm$ 0.00  | 0.33 $\pm$ 0.05  | 0.27 $\pm$ 0.06  | 0.08 $\pm$ 0.01  |
| total phenolics                 | 69.36 $\pm$ 6.35 | 64.53 $\pm$ 3.96 | 56.12 $\pm$ 3.17 | 24.03 $\pm$ 0.98 |
| Shengeh                         |                  |                  |                  |                  |
| Phenolics ( $\mu\text{mol/g}$ ) | Stage I          | Stage II         | Stage III        | Stage IV         |
| Hydroxytyrosol-G                | 0.63 $\pm$ 0.05  | 1.54 $\pm$ 0.01  | 2.17 $\pm$ 0.02  | 2.54 $\pm$ 0.29  |
| Tyrosol-G                       | 0.05 $\pm$ 0.01  | 0.09 $\pm$ 0.00  | 0.28 $\pm$ 0.00  | 0.35 $\pm$ 0.03  |
| Demethyloleuropein              | 0.28 $\pm$ 0.01  | 0.32 $\pm$ 0.03  | 0.05 $\pm$ 0.00  | 0.40 $\pm$ 0.01  |
| Demethyligstroside              | 0.08 $\pm$ 0.00  | 0.12 $\pm$ 0.00  | 0.09 $\pm$ 0.10  | 0.05 $\pm$ 0.00  |
| Oleuropein                      | 21.84 $\pm$ 1.15 | 12.25 $\pm$ 0.61 | 7.04 $\pm$ 0.57  | 7.97 $\pm$ 0.00  |
| Ligstroside                     | 2.34 $\pm$ 0.12  | 1.92 $\pm$ 0.18  | 1.38 $\pm$ 0.09  | 1.25 $\pm$ 0.00  |
| Verbascoside                    | 0.02 $\pm$ 0.00  | 0.16 $\pm$ 0.01  | 0.07 $\pm$ 0.03  | 0.19 $\pm$ 0.02  |
| Luteolin -7-G                   | 0.33 $\pm$ 0.04  | 0.36 $\pm$ 0.06  | 0.24 $\pm$ 0.02  | 0.18 $\pm$ 0.02  |
| total phenolics                 | 25.57 $\pm$ 1.38 | 16.76 $\pm$ 0.91 | 11.32 $\pm$ 0.83 | 12.92 $\pm$ 0.38 |
| Piñonera                        |                  |                  |                  |                  |
| Phenolics ( $\mu\text{mol/g}$ ) | Stage I          | Stage II         | Stage III        | Stage IV         |
| Hydroxytyrosol-G                | 1.09 $\pm$ 0.25  | 0.94 $\pm$ 0.24  | 2.46 $\pm$ 0.64  | 2.18 $\pm$ 0.08  |
| Tyrosol-G                       | 0.32 $\pm$ 0.16  | 0.21 $\pm$ 0.05  | 0.35 $\pm$ 0.09  | 0.35 $\pm$ 0.00  |
| Demethyloleuropein              | 0.42 $\pm$ 0.05  | 0.29 $\pm$ 0.06  | 3.24 $\pm$ 1.58  | 15.80 $\pm$ 0.61 |
| Demethyligstroside              | 0.44 $\pm$ 0.19  | 0.03 $\pm$ 0.00  | 0.02 $\pm$ 0.02  | 0.01 $\pm$ 0.01  |
| Oleuropein                      | 46.41 $\pm$ 4.36 | 36.57 $\pm$ 0.13 | 29.22 $\pm$ 3.66 | 4.70 $\pm$ 0.03  |
| Ligstroside                     | 6.41 $\pm$ 2.31  | 4.21 $\pm$ 0.02  | 3.31 $\pm$ 0.76  | 0.80 $\pm$ 0.11  |
| Verbascoside                    | 1.85 $\pm$ 0.15  | 2.10 $\pm$ 0.65  | 2.16 $\pm$ 0.12  | 2.17 $\pm$ 0.08  |
| Luteolin -7-G                   | 0.33 $\pm$ 0.08  | 0.20 $\pm$ 0.10  | 0.38 $\pm$ 0.08  | 0.17 $\pm$ 0.02  |
| total phenolics                 | 57.25 $\pm$ 7.55 | 44.55 $\pm$ 1.25 | 41.14 $\pm$ 6.93 | 26.17 $\pm$ 0.94 |

(\*) Data are mean contents and standard deviations from three different analyses.



**Table S4.** Phenolic composition of virgin olive oils obtained from Picual, Menya, Shengeh, Piñonera, Klon, Dokkar and Abou Kanani cultivars.

| Olive cultivar            | Picual III |   |      | Menya III |   |      | Shengeh III |   |      | Piñonera III |   |     | Klon III |   |      | Dokkar III |   |      | Abou Kanani III |   |     |
|---------------------------|------------|---|------|-----------|---|------|-------------|---|------|--------------|---|-----|----------|---|------|------------|---|------|-----------------|---|-----|
| Phenolics (µg/g oil)      |            |   |      |           |   |      |             |   |      |              |   |     |          |   |      |            |   |      |                 |   |     |
| Hydroxytyrosol            | 1.5        | ± | 0.32 | 1.1       | ± | 0.1  | 1.0         | ± | 0.1  | 1.0          | ± | 0.1 | 0.3      | ± | 0.2  | 1.7        | ± | 1.5  | 0.5             | ± | 0.2 |
| Tyrosol                   | 1.9        | ± | 0.1  | 3.8       | ± | 0.1  | 3.4         | ± | 0.1  | 3.4          | ± | 0.1 | 3.7      | ± | 0.2  | 2.3        | ± | 0.2  | 1.4             | ± | 0.0 |
| Vanillic acid             | 0.2        | ± | 0.0  | 0.4       | ± | 0.0  | 0.1         | ± | 0.0  | 0.1          | ± | 0.0 | 0.1      | ± | 0.0  | 0.2        | ± | 0.0  | 0.3             | ± | 0.0 |
| Vainillin                 | 0.1        | ± | 0.0  | 0.3       | ± | 0.0  | 0.0         | ± | 0.1  | 0.1          | ± | 0.0 | 0.1      | ± | 0.0  | 0.1        | ± | 0.0  | 0.0             | ± | 0.0 |
| p-coumaric acid           | 0.9        | ± | 0.0  | 0.2       | ± | 0.0  | 0.5         | ± | 0.5  | 0.5          | ± | 0.1 | 2.2      | ± | 2.6  | 0.2        | ± | 0.0  | 0.3             | ± | 0.0 |
| Hydroxytyrosol ac.        | 0.3        | ± | 0.3  | 2.4       | ± | 0.2  | 3.8         | ± | 30.0 | 3.8          | ± | 0.0 | 5.2      | ± | 0.2  | 3.2        | ± | 0.4  | 2.5             | ± | 0.1 |
| 3,4-DHPEA-EDA             | 39.2       | ± | 1.4  | 121.3     | ± | 1.2  | 59.6        | ± | 4.4  | 59.6         | ± | 4.4 | 165.7    | ± | 5.0  | 158.2      | ± | 13.1 | 124.2           | ± | 5.6 |
| p-HPEA-EDA                | 36.9       | ± | 4.6  | 87.6      | ± | 2.7  | 97.7        | ± | 2.0  | 60.7         | ± | 2.0 | 113.5    | ± | 4.0  | 63.3       | ± | 7.4  | 32.1            | ± | 2.2 |
| Pinoresinol               | 9.3        | ± | 0.7  | 6.2       | ± | 0.2  | 2.1         | ± | 0.0  | 2.1          | ± | 0.0 | 6.7      | ± | 0.3  | 6.2        | ± | 0.8  | 3.8             | ± | 0.1 |
| Cinnamic acid             | 1.3        | ± | 0.3  | 2.2       | ± | 0.2  | 0.4         | ± | 0.0  | 0.4          | ± | 0.0 | 2.2      | ± | 0.3  | 0.6        | ± | 0.1  | 0.4             | ± | 0.0 |
| Acetoxypinoresinol        | 32.1       | ± | 5.9  | 47.7      | ± | 3.8  | 4.4         | ± | 0.0  | 4.4          | ± | 0.0 | 49.3     | ± | 0.6  | 10.9       | ± | 1.4  | 24.3            | ± | 0.2 |
| 3,4-DHPEA-EA              | 854.7      | ± | 26.4 | 388.8     | ± | 7.3  | 11.9        | ± | 2.0  | 11.9         | ± | 2.0 | 439.7    | ± | 13.3 | 147.6      | ± | 14.2 | 247.1           | ± | 1.9 |
| p-HPEA-EA                 | 37.1       | ± | 6.6  | 40.0      | ± | 4.3  | 5.9         | ± | 0.0  | 5.9          | ± | 0.2 | 21.9     | ± | 2.1  | 21.2       | ± | 1.9  | 12.2            | ± | 0.3 |
| Feruli acid               | 0.0        | ± | 0.0  | 0.0       | ± | 0.0  | 0.1         | ± | 0.0  | 0.1          | ± | 0.0 | 0.1      | ± | 0.2  | 0.0        | ± | 0.0  | 0.1             | ± | 0.0 |
| Luteolin                  | 8.3        | ± | 0.1  | 1.5       | ± | 0.0  | 2.3         | ± | 0.0  | 2.3          | ± | 0.0 | 7.2      | ± | 0.1  | 0.7        | ± | 0.1  | 7.8             | ± | 0.1 |
| Apigenin                  | 1.9        | ± | 0.1  | 0.2       | ± | 0.0  | 0.3         | ± | 0.0  | 0.3          | ± | 0.0 | 0.5      | ± | 0.7  | 0.3        | ± | 0.0  | 2.5             | ± | 0.1 |
| total phenolics           | 1025.8     | ± | 20.9 | 703.8     | ± | 19.6 | 215.7       | ± | 4.4  | 156.6        | ± | 4.4 | 818.3    | ± | 29.6 | 416.8      | ± | 38.1 | 459.5           | ± | 5.1 |
| total <i>o</i> -phenolics | 904.1      | ± | 27.9 | 515.1     | ± | 8.8  | 91.7        | ± | 2.4  | 78.6         | ± | 2.4 | 618.1    | ± | 18.8 | 311.4      | ± | 26.3 | 382.0           | ± | 3.5 |
| total secoiridoids        | 967.9      | ± | 25.8 | 637.7     | ± | 15.4 | 138.1       | ± | 4.6  | 138.1        | ± | 4.6 | 740.7    | ± | 24.3 | 390.3      | ± | 36.6 | 415.6           | ± | 5.5 |

(\*) Data are mean contents and standard deviations from three different analyses.

**Table S5.** Real Time-Quantitative PCR primers used in this work.

| Primer             | Sequence (5' → 3')            |
|--------------------|-------------------------------|
| qOePAR-Fc          | GGAAACTGTCGAAAGCTTGAAGGAGAAG  |
| qOePAR1.1-R        | GAATTAAAGATGGGCACAAACACCTCA   |
| qOePAR1.2-R        | CCACTCTCTCAGTAGCATAACAAAGCTAG |
| qOeEF1 $\alpha$ -F | TGCTCTATCTGGATTGCCATT         |
| qOeEF1 $\alpha$ -R | TCAAATGCCACCATGACTTC          |
| qOeGAPDH-F         | TGAGATGCTGCACAATGGTT          |
| qOeGAPDH-R         | CACGATAGGCTTACGCAACA          |
